# Supplementary material
Source: publisher figshare collection journal article supplement (https://tandf.figshare.com/ndownloader/files/17936684)
Supplement: Supplementary file 1 [file 17936684]

Supplemental information

**SI Table 1. Range of all AT acquired by pwMND.**

| Assistive technology or device | N |
| --- | --- |
| iPad | 46 |
| iPad + *non/low tech aids | 10 |
| iPad + LightwriterTM | 2 |
| iPad + computer access | 1 |
| iPad + smartphone | 1 |
| Access method only specified | 26 |
| LightwriterTM | 11 |
| *Non/low tech aids | 7 |
| Mobile phone | 5 |
| Personal computer/laptop | 5 |
| Tablet | 4 |
| Unspecified | 4 |
| Communication software | 4 |
| Environmental control | 3 |
| Personal computer/laptop + tablet | 2 |
| Voice amplifier | 2 |
| Accent 800TM communication device | 1 |
| Total | 134 |

AT acquisition data were recorded for 36.1% of all pwMND.

*****non/low technology includes; communication book, board or cards.

|  | Months |
| --- | --- |
| Minimum | 0 |
| Maximum | 208.7 |
| Median | 1.7 |
| Interquartile range | 15.6 |


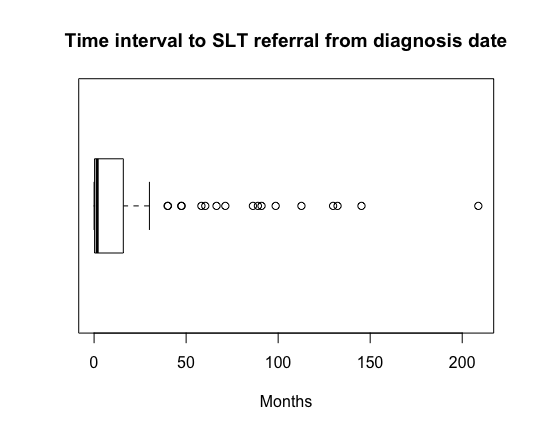


**SI Fig. 1. Boxplot showing time interval from diagnosis date (inclusive) to SLT referral date for all pwMND**

|  | Months |
| --- | --- |
| Minimum | 0.03 |
| Maximum | 208.7 |
| Median | 3.3 |
| Interquartile range | 17.9 |


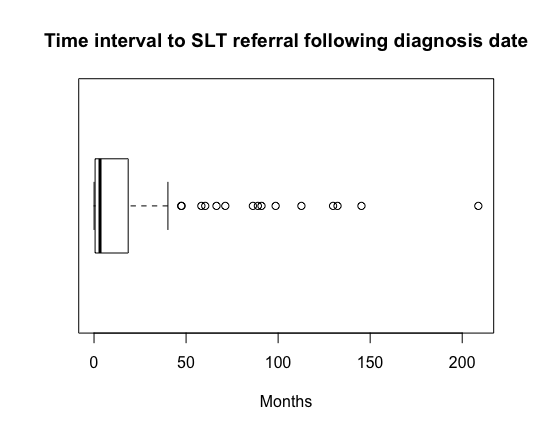


**SI Fig. 2. Boxplot showing time interval following diagnosis date to SLT referral date for all pwMND**
